# Supplementary material for: Gene signature associated with benign neurofibroma transformation to malignant peripheral nerve sheath tumors
Source: PLoS One. 2017 May 24;12(5):e0178316. doi: 10.1371/journal.pone.0178316 (PMC5443557; doi:10.1371/journal.pone.0178316)
Supplement: S3 Table — (XLS) [file pone.0178316.s003.xls]

## Sheet: Table A
S3_Table: Results retrieved from NFFinder.
S3_Table (Table A): Results retrieved from inverse comparison of the MPNST vs. NF gene signature and CMap and DrugMatrix databases.
Drug	Score	pvalue	dbid	Title	Description	Test	Control	url
MS-275	70.731201148893	0.000999000999000999	Instance ID: 7084	PC3 cell line: MS-275 at 1e-05 M	PC3 cell line treated with MS-275 (MS-275) at 1e-05 M concentration in DMSO for 6 hours	MS-275	control	https://www.broadinstitute.org/cmap/
MS-275	70.040842182476	0.000999000999000999	Instance ID: 7074	PC3 cell line: MS-275 at 1e-05 M	PC3 cell line treated with MS-275 (MS-275) at 1e-05 M concentration in DMSO for 6 hours	MS-275	control	https://www.broadinstitute.org/cmap/
Trichostatin A	67.837700607687	0.000999000999000999	Instance ID: 4302	PC3 cell line: trichostatin A at 1e-07 M	PC3 cell line treated with trichostatin A (\"Trichostatin A, from Streptomyces sp.\") at 1e-07 M concentration in DMSO for 6 hours	Trichostatin A	control	https://www.broadinstitute.org/cmap/
Trichostatin A	67.7075665500647	0.000999000999000999	Instance ID: 5802	PC3 cell line: trichostatin A at 1e-07 M	PC3 cell line treated with trichostatin A (\"Trichostatin A, from Streptomyces sp.\") at 1e-07 M concentration in DMSO for 6 hours	Trichostatin A	control	https://www.broadinstitute.org/cmap/
Trichostatin A	66.9966175651628	0.000999000999000999	Instance ID: 3791	PC3 cell line: trichostatin A at 1e-07 M	PC3 cell line treated with trichostatin A (\"Trichostatin A, from Streptomyces sp.\") at 1e-07 M concentration in DMSO for 6 hours	Trichostatin A	control	https://www.broadinstitute.org/cmap/
Trichostatin A	66.9105263544268	0.000999000999000999	Instance ID: 2794	MCF7 cell line: trichostatin A at 1e-07 M	MCF7 cell line treated with trichostatin A (\"Trichostatin A, from Streptomyces sp.\") at 1e-07 M concentration in DMSO for 6 hours	Trichostatin A	control	https://www.broadinstitute.org/cmap/
Trichostatin A	66.8267666885819	0.000999000999000999	Instance ID: 6609	PC3 cell line: trichostatin A at 1e-07 M	PC3 cell line treated with trichostatin A (\"Trichostatin A, from Streptomyces sp.\") at 1e-07 M concentration in DMSO for 6 hours	Trichostatin A	control	https://www.broadinstitute.org/cmap/
Rifabutin	66.7543336001213	0.000999000999000999	Instance ID: 4527	PC3 cell line: rifabutin at 4.8e-06 M	PC3 cell line treated with rifabutin (Rifabutin [72559-06-9]) at 4.8e-06 M concentration in DMSO for 6 hours	Rifabutin	control	https://www.broadinstitute.org/cmap/
Trichostatin A	66.6933503669154	0.000999000999000999	Instance ID: 6874	PC3 cell line: trichostatin A at 1e-06 M	PC3 cell line treated with trichostatin A (\"trichostatin A, Streptomyces sp.\") at 1e-06 M concentration in DMSO for 6 hours	Trichostatin A	control	https://www.broadinstitute.org/cmap/
Trichostatin A	66.5262651214267	0.000999000999000999	Instance ID: 7047	PC3 cell line: trichostatin A at 1e-06 M	PC3 cell line treated with trichostatin A (\"trichostatin A, Streptomyces sp.\") at 1e-06 M concentration in DMSO for 6 hours	Trichostatin A	control	https://www.broadinstitute.org/cmap/
Trichostatin A	66.5151673862593	0.000999000999000999	Instance ID: 3688	PC3 cell line: trichostatin A at 1e-07 M	PC3 cell line treated with trichostatin A (\"Trichostatin A, from Streptomyces sp.\") at 1e-07 M concentration in DMSO for 6 hours	Trichostatin A	control	https://www.broadinstitute.org/cmap/
Trichostatin A	66.2865558846811	0.000999000999000999	Instance ID: 5260	MCF7 cell line: trichostatin A at 1e-07 M	MCF7 cell line treated with trichostatin A (\"Trichostatin A, from Streptomyces sp.\") at 1e-07 M concentration in DMSO for 6 hours	Trichostatin A	control	https://www.broadinstitute.org/cmap/
Trichostatin A	66.1929567831988	0.000999000999000999	Instance ID: 5625	MCF7 cell line: trichostatin A at 1e-07 M	MCF7 cell line treated with trichostatin A (\"Trichostatin A, from Streptomyces sp.\") at 1e-07 M concentration in DMSO for 6 hours	Trichostatin A	control	https://www.broadinstitute.org/cmap/
Pnu-0251126	66.1416905442275	0.000999000999000999	Instance ID: 3689	PC3 cell line: PNU-0251126 at 1e-05 M	PC3 cell line treated with PNU-0251126 (PNU-0251126 [267429-19-6]) at 1e-05 M concentration in DMSO for 6 hours	PNU-0251126	control	https://www.broadinstitute.org/cmap/
Ellipticine	66.0653854999234	0.000999000999000999	Instance ID: 2758	MCF7 cell line: ellipticine at 1.62e-05 M	MCF7 cell line treated with ellipticine (Ellipticine [519-23-3]) at 1.62e-05 M concentration in DMSO for 6 hours	Ellipticine	control	https://www.broadinstitute.org/cmap/
Trichostatin A	65.9995490859314	0.000999000999000999	Instance ID: 5987	MCF7 cell line: trichostatin A at 1e-07 M	MCF7 cell line treated with trichostatin A (\"Trichostatin A, from Streptomyces sp.\") at 1e-07 M concentration in DMSO for 6 hours	Trichostatin A	control	https://www.broadinstitute.org/cmap/
Trichostatin A	65.9809247689108	0.000999000999000999	Instance ID: 3787	PC3 cell line: trichostatin A at 1e-07 M	PC3 cell line treated with trichostatin A (\"Trichostatin A, from Streptomyces sp.\") at 1e-07 M concentration in DMSO for 6 hours	Trichostatin A	control	https://www.broadinstitute.org/cmap/
Trichostatin A	65.9444335279342	0.000999000999000999	Instance ID: 6085	MCF7 cell line: trichostatin A at 1e-07 M	MCF7 cell line treated with trichostatin A (\"Trichostatin A, from Streptomyces sp.\") at 1e-07 M concentration in DMSO for 6 hours	Trichostatin A	control	https://www.broadinstitute.org/cmap/
Trichostatin A	65.8142086532413	0.000999000999000999	Instance ID: 4665	PC3 cell line: trichostatin A at 1e-07 M	PC3 cell line treated with trichostatin A (\"Trichostatin A, from Streptomyces sp.\") at 1e-07 M concentration in DMSO for 6 hours	Trichostatin A	control	https://www.broadinstitute.org/cmap/
Trichostatin A	65.7119139516508	0.000999000999000999	Instance ID: 7073	PC3 cell line: trichostatin A at 1e-06 M	PC3 cell line treated with trichostatin A (\"trichostatin A, Streptomyces sp.\") at 1e-06 M concentration in DMSO for 6 hours	Trichostatin A	control	https://www.broadinstitute.org/cmap/
Trichostatin A	65.5985243037558	0.000999000999000999	Instance ID: 3395	MCF7 cell line: trichostatin A at 1e-07 M	MCF7 cell line treated with trichostatin A (\"Trichostatin A, from Streptomyces sp.\") at 1e-07 M concentration in DMSO for 6 hours	Trichostatin A	control	https://www.broadinstitute.org/cmap/
Trichostatin A	65.5538092024742	0.000999000999000999	Instance ID: 2268	MCF7 cell line: trichostatin A at 1e-07 M	MCF7 cell line treated with trichostatin A (\"Trichostatin A, from Streptomyces sp.\") at 1e-07 M concentration in DMSO for 6 hours	Trichostatin A	control	https://www.broadinstitute.org/cmap/
Cantharidin	65.5231229812109	0.000999000999000999	Instance ID: 3075	HL60 cell line: cantharidin at 2.04e-05 M	HL60 cell line treated with cantharidin (Cantharidin [56-25-7]) at 2.04e-05 M concentration in DMSO for 6 hours	Cantharidin	control	https://www.broadinstitute.org/cmap/
Hc toxin	65.519991031396	0.000999000999000999	Instance ID: 909	MCF7 cell line: HC toxin at 1e-07 M	MCF7 cell line treated with HC toxin (HC toxin from Helminthosporium carbonum) at 1e-07 M concentration in DMSO for 6 hours	HC toxin	control	https://www.broadinstitute.org/cmap/
Trichostatin A	65.4829942652914	0.000999000999000999	Instance ID: 6546	PC3 cell line: trichostatin A at 1e-06 M	PC3 cell line treated with trichostatin A (\"trichostatin A, Streptomyces sp.\") at 1e-06 M concentration in DMSO for 6 hours	Trichostatin A	control	https://www.broadinstitute.org/cmap/
Trichostatin A	65.3924658729601	0.000999000999000999	Instance ID: 4184	PC3 cell line: trichostatin A at 1e-07 M	PC3 cell line treated with trichostatin A (\"Trichostatin A, from Streptomyces sp.\") at 1e-07 M concentration in DMSO for 6 hours	Trichostatin A	control	https://www.broadinstitute.org/cmap/
Trichostatin A	65.3661243956457	0.000999000999000999	Instance ID: 3243	MCF7 cell line: trichostatin A at 1e-07 M	MCF7 cell line treated with trichostatin A (\"Trichostatin A, from Streptomyces sp.\") at 1e-07 M concentration in DMSO for 6 hours	Trichostatin A	control	https://www.broadinstitute.org/cmap/
Trichostatin A	65.2091697995178	0.000999000999000999	Instance ID: 2835	MCF7 cell line: trichostatin A at 1e-07 M	MCF7 cell line treated with trichostatin A (\"Trichostatin A, from Streptomyces sp.\") at 1e-07 M concentration in DMSO for 6 hours	Trichostatin A	control	https://www.broadinstitute.org/cmap/
Trichostatin A	65.1985929854388	0.000999000999000999	Instance ID: 7236	MCF7 cell line: trichostatin A at 1e-07 M	MCF7 cell line treated with trichostatin A (\"Trichostatin A, from Streptomyces sp.\") at 1e-07 M concentration in DMSO for 6 hours	Trichostatin A	control	https://www.broadinstitute.org/cmap/
Tamoxifen	65.1859327293803	0.000999000999000999	Instance ID: 2212	MCF7 cell line: tamoxifen at 7e-06 M	MCF7 cell line treated with tamoxifen (Tamoxifen citrate [54965-24-1]) at 7e-06 M concentration in DMSO for 6 hours	Tamoxifen	control	https://www.broadinstitute.org/cmap/
Trichostatin A	65.1539438625015	0.000999000999000999	Instance ID: 4436	PC3 cell line: trichostatin A at 1e-07 M	PC3 cell line treated with trichostatin A (\"Trichostatin A, Streptomyces sp.\") at 1e-07 M concentration in DMSO for 6 hours	Trichostatin A	control	https://www.broadinstitute.org/cmap/
Trichostatin A	65.1446137699276	0.000999000999000999	Instance ID: 992	MCF7 cell line: trichostatin A at 1e-07 M	MCF7 cell line treated with trichostatin A (\"Trichostatin A, Streptomyces sp.\") at 1e-07 M concentration in DMSO for 6 hours	Trichostatin A	control	https://www.broadinstitute.org/cmap/
Trichostatin A	65.067557509914	0.000999000999000999	Instance ID: 6993	MCF7 cell line: trichostatin A at 1e-06 M	MCF7 cell line treated with trichostatin A (\"Trichostatin A, Streptomyces sp.\") at 1e-06 M concentration in DMSO for 6 hours	Trichostatin A	control	https://www.broadinstitute.org/cmap/
Trichostatin A	65.059441028762	0.000999000999000999	Instance ID: 2639	MCF7 cell line: trichostatin A at 1e-07 M	MCF7 cell line treated with trichostatin A (\"Trichostatin A, from Streptomyces sp.\") at 1e-07 M concentration in DMSO for 6 hours	Trichostatin A	control	https://www.broadinstitute.org/cmap/
Trichostatin A	65.0549681505921	0.000999000999000999	Instance ID: 3510	MCF7 cell line: trichostatin A at 1e-07 M	MCF7 cell line treated with trichostatin A (\"Trichostatin A, from Streptomyces sp.\") at 1e-07 M concentration in DMSO for 6 hours	Trichostatin A	control	https://www.broadinstitute.org/cmap/
Trichostatin A	65.0273683827374	0.000999000999000999	Instance ID: 5976	MCF7 cell line: trichostatin A at 1e-06 M	MCF7 cell line treated with trichostatin A (\"trichostatin A, Streptomyces sp.\") at 1e-06 M concentration in DMSO for 6 hours	Trichostatin A	control	https://www.broadinstitute.org/cmap/
Trichostatin A	64.9637645594847	0.000999000999000999	Instance ID: 4710	MCF7 cell line: trichostatin A at 1e-07 M	MCF7 cell line treated with trichostatin A (\"Trichostatin A, from Streptomyces sp.\") at 1e-07 M concentration in DMSO for 6 hours	Trichostatin A	control	https://www.broadinstitute.org/cmap/
Trichostatin A	64.9410680401234	0.000999000999000999	Instance ID: 5745	PC3 cell line: trichostatin A at 1e-07 M	PC3 cell line treated with trichostatin A (\"Trichostatin A, from Streptomyces sp.\") at 1e-07 M concentration in DMSO for 6 hours	Trichostatin A	control	https://www.broadinstitute.org/cmap/
Trichostatin A	64.9269525467644	0.000999000999000999	Instance ID: 4237	PC3 cell line: trichostatin A at 1e-07 M	PC3 cell line treated with trichostatin A (\"Trichostatin A, from Streptomyces sp.\") at 1e-07 M concentration in DMSO for 6 hours	Trichostatin A	control	https://www.broadinstitute.org/cmap/
Trichostatin A	64.8975682968934	0.000999000999000999	Instance ID: 5693	MCF7 cell line: trichostatin A at 1e-07 M	MCF7 cell line treated with trichostatin A (\"Trichostatin A, from Streptomyces sp.\") at 1e-07 M concentration in DMSO for 6 hours	Trichostatin A	control	https://www.broadinstitute.org/cmap/
Scriptaid	64.8516233403219	0.000999000999000999	Instance ID: 6901	MCF7 cell line: scriptaid at 1e-05 M	MCF7 cell line treated with scriptaid (scriptaid) at 1e-05 M concentration in DMSO for 6 hours	Scriptaid	control	https://www.broadinstitute.org/cmap/
Medrysone	64.8275860426043	0.000999000999000999	Instance ID: 2544	HL60 cell line: medrysone at 1.16e-05 M	HL60 cell line treated with medrysone (Medrysone [2668-66-8]) at 1.16e-05 M concentration in DMSO for 6 hours	Medrysone	control	https://www.broadinstitute.org/cmap/
Trichostatin A	64.8169019633547	0.000999000999000999	Instance ID: 6340	PC3 cell line: trichostatin A at 1e-07 M	PC3 cell line treated with trichostatin A (\"Trichostatin A, from Streptomyces sp.\") at 1e-07 M concentration in DMSO for 6 hours	Trichostatin A	control	https://www.broadinstitute.org/cmap/
Trichostatin A	64.7942616035401	0.000999000999000999	Instance ID: 4565	PC3 cell line: trichostatin A at 1e-07 M	PC3 cell line treated with trichostatin A (\"Trichostatin A, from Streptomyces sp.\") at 1e-07 M concentration in DMSO for 6 hours	Trichostatin A	control	https://www.broadinstitute.org/cmap/
Trichostatin A	64.7865332536857	0.000999000999000999	Instance ID: 2881	MCF7 cell line: trichostatin A at 1e-07 M	MCF7 cell line treated with trichostatin A (\"Trichostatin A, from Streptomyces sp.\") at 1e-07 M concentration in DMSO for 6 hours	Trichostatin A	control	https://www.broadinstitute.org/cmap/
Trichostatin A	64.7626682425909	0.000999000999000999	Instance ID: 6784	MCF7 cell line: trichostatin A at 1e-07 M	MCF7 cell line treated with trichostatin A (\"Trichostatin A, from Streptomyces sp.\") at 1e-07 M concentration in DMSO for 6 hours	Trichostatin A	control	https://www.broadinstitute.org/cmap/
Trichostatin A	64.7487728353801	0.000999000999000999	Instance ID: 4770	MCF7 cell line: trichostatin A at 1e-07 M"	MCF7 cell line treated with trichostatin A (\"Trichostatin A, from Streptomyces sp.\") at 1e-07 M concentration in DMSO for 6 hours	Trichostatin A	control	https://www.broadinstitute.org/cmap/
Trichostatin A	64.7473628413885	0.000999000999000999	Instance ID: 3643	MCF7 cell line: trichostatin A at 1e-07 M	MCF7 cell line treated with trichostatin A (\"Trichostatin A, from Streptomyces sp.\") at 1e-07 M concentration in DMSO for 6 hours	Trichostatin A	control	https://www.broadinstitute.org/cmap/
Scriptaid	64.6957745747029	0.000999000999000999	Instance ID: 6919	PC3 cell line treated with scriptaid (scriptaid) at 1e-05 M concentration in DMSO for 6 hours	PC3 cell line treated with scriptaid (scriptaid) at 1e-05 M concentration in DMSO for 6 hours	Scriptaid	control	https://www.broadinstitute.org/cmap/
Trichostatin A	64.6634323296301	0.000999000999000999	Instance ID: 1672	MCF7 cell line: trichostatin A at 1e-07 M	MCF7 cell line treated with trichostatin A (\"Trichostatin A, from Streptomyces sp.\") at 1e-07 M concentration in DMSO for 6 hours	Trichostatin A	control	https://www.broadinstitute.org/cmap/

## Sheet: Table B
S3 Table: Results retrieved from NFFinder.
S3_Table (Table B): Results retrieved from direct comparison of the MPNST vs. NF gene signature and GEO database.
GEO accession	Score	pvalue	Title	Description	Condition	Test	Control	url	Drug	Disease
GDS3482	89.0584617632624	0.000999000999000999	X-linked inhibitor of apoptosis XIAP depletion effect on a colorectal cancer cell line	Analysis of early and late passage HCT116 colon cancer cells depleted for X-linked inhibitor of apoptosis (XIAP). XIAP is overexpressed in the majority of NCI 60 cell lines compared to normal cells suggesting a potential role as a therapeutic target in a wide spectrum of malignancies	other	late passage	control	http://www.ncbi.nlm.nih.gov/sites/GDSbrowser?acc=GDS3482	X-linked Inhibitor of Apoptosis;BIRC4 protein, human	Colon cancer;Colon Carcinoma;Colon Cancer;Malignant tumor of colon;Malignant Neoplasms;MALIGNANCIES
GDS3313	88.6132695225619	0.000999000999000999	Tibolone hormone effect on postmenopausal endometrium	Comparison of endometria after short-term treatment with tibolone, estradiol (E2), or E2 + medroxyprogesterone acetate (E2 + MPA) in healthy postmenopausal women undergoing hysterectomy. A synthetic steroid, Tibolone is used as an alternative for estrogen or estrogen/progesterone hormone therapy	agent	estradiol	control	http://www.ncbi.nlm.nih.gov/sites/GDSbrowser?acc=GDS3313	medroxyprogesterone acetate;Estrogen;Estrogen [EPC];Progesterone [EPC];Estradiol;tibolone;Progesterone;Synthetic steroid;Estrogens
GDS2052	88.2180531637713	0.000999000999000999	Endometrium throughout the menstrual cycle	Analysis of the normal endometrium at distinct phases of the menstrual cycle. Results provide insight into whether molecular profiles of the endometrium can distinguish the different phases of the menstrual cycle	other	proliferative phase	mid secretory phase	http://www.ncbi.nlm.nih.gov/sites/GDSbrowser?acc=GDS2052
GDS2418	87.9780449716403	0.000999000999000999	Vulvar intraepithelial neoplasia	Analysis of vulvar intraepithelial neoplasia (VIN) lesions. VIN is a premalignant disorder caused by human papillomaviruses. Results provide insight into the pathogenesis of VIN	disease.state	vulvar intraepithelial neoplasia	control	http://www.ncbi.nlm.nih.gov/sites/GDSbrowser?acc=GDS2418		Human Papillomavirus;Pathogenesis;Intraepithelial Neoplasia of Vulva;Human papillomaviruses;Vulvar Intraepithelial Neoplasia;Intraepithelial Neoplasia of the Vulva;Vulval intraepithelial neoplasia;Precancerous Conditions;Premalignant disorder
GDS4282	87.1578478339273	0.000999000999000999	Clear-cell renal cell carcinoma tumors and tumorgrafts deficient for tumor suppressor BAP1 or PBRM1	Analysis of BAP1- and PBRM1-deficient ccRCC primary tumors, tumors growing in immunodeficient mice (tumorgrafts), and matched normal kidney cortices. BAP1 loss, but not PBRM1 loss, is associated with high-grade tumors. Results provide insight into molecular classification of RCC subtypes	tissue	tumorgraft _p0	normal cortex	http://www.ncbi.nlm.nih.gov/sites/GDSbrowser?acc=GDS4282	Protein Polybromo-1;PBRM1	Primary tumors;Tumors;Primary Neoplasm;Neoplasm
GDS3341	83.4820705580316	0.000999000999000999	Nasopharyngeal carcinoma	Analysis of 31 laser-captured, microdissected nasopharyngeal carcinoma (NPC) tissues samples. NPC is an Epstein-Barr virus (EBV)-associated epithelial cancer prevalent in Southeast Asia. Results provide insight into the molecular mechanisms involved in EBV-associated epithelial cancers	other	stage T3N1	n/a	http://www.ncbi.nlm.nih.gov/sites/GDSbrowser?acc=GDS3341		Cancer;Malignant Neoplasms;Epstein-Barr Virus;Primary malignant neoplasm;Nasopharyngeal carcinoma
GDS3853	82.9795500921487	0.000999000999000999	Ductal carcinoma in situ: mammary gland	Analysis of ductal carcinoma in situ (DCIS) of mammary gland. DCIS represents an early, pre-invasive stage in development of invasive breast carcinoma. These results, together with results from a rodent model of DCIS development, provide insight into molecular basis of early stages of breast cancer	disease.state	ductal carcinoma in situ (DCIS)	control (healthy breast)	"http://www.ncbi.nlm.nih.gov/sites/GDSbrowser?acc=GDS3853		Malignant neoplasm of breast;Ductal Carcinoma In Situ;Noninfiltrating Intraductal Carcinoma;Invasive Breast Carcinoma;Cancer of Breast;Mammary Ductal Carcinoma;Breast Carcinoma;Mammary gland ductal carcinoma;Invasive Carcinoma of Breast
GDS4102	82.8497774159188	0.000999000999000999	Pancreatic Tumor and Normal tissue samples	Analysis of tumor tissue and normal tissue in pancreatic cancer samples. The fresh frozen samples were obtained during surgical procedures. Results provide insight into molecular mechanisms underlying tumorigenesis	tissue	tumor	normal	http://www.ncbi.nlm.nih.gov/sites/GDSbrowser?acc=GDS4102		Pancreatic carcinoma;Malignant neoplasm of pancreas;PANCREATIC CANCER;Tumorigenesis;Carcinogenesis;Pancreatic Cancer;Neoplastic Cell Transformation
GDS2052	81.2313811031796	0.000999000999000999	Endometrium throughout the menstrual cycle	Analysis of the normal endometrium at distinct phases of the menstrual cycle. Results provide insight into whether molecular profiles of the endometrium can distinguish the different phases of the menstrual cycle	other	proliferative phase	late secretory phase	http://www.ncbi.nlm.nih.gov/sites/GDSbrowser?acc=GDS2052
GDS1439	80.0653050576949	0.000999000999000999	Prostate cancer progression	Expression profiling of prostate cancer tumors that are benign, clinically localized, or metastatic and refractory to hormones. Results compared to those obtained from immunoblotting to identify concordant changes in mRNA and protein levels	disease.state	metastatic	benign	http://www.ncbi.nlm.nih.gov/sites/GDSbrowser?acc=GDS1439	Hormones	Neoplasm;Prostate carcinoma;Tumors;Malignant neoplasm of prostate;Cancer of Prostate
GDS2819	79.5552151532702	0.000999000999000999	Leukemic white blood cells and various RNA preparation protocols	Analysis of RNA samples prepared from leukemic white blood cells using 3 different protocols. Samples obtained from 27 pediatric patients with various subtypes of acute leukemia. Results provide insight into the impact of RNA preparation methods on the variation in gene expression data	disease.state	c-ALL, Pre-B-ALL without t 9,22	AML with normal karyotype and other abnormalities	http://www.ncbi.nlm.nih.gov/sites/GDSbrowser?acc=GDS2819		Acute leukaemia;Acute Leukemia Not Otherwise Specified;Acute leukemia;Acute Undifferentiated Leukemia
GDS4296	74.7111669177816	0.000999000999000999	NCI-60 cancer cell line panel	Analysis of cell lines from 9 different cancer tissue of origin types (Breast, Central Nervous System, Colon, Leukemia, Melanoma, Non-Small Cell Lung, Ovarian, Prostate, and Renal) from the NCI-60 panel. Results provide insight into molecular mechanisms underlying the various cancer types	tissue	renal	prostate	http://www.ncbi.nlm.nih.gov/sites/GDSbrowser?acc=GDS4296		Leukemia;Malignant Neoplasms;melanoma;Leukaemia;Primary malignant neoplasm;Cancer
GDS4160	73.8058520446851	0.000999000999000999	Hepatitis C Virus infection effect on Huh7 hepatoma cells: time course	Analysis of Huh7 hepatoma cells infected with JFH-1 Hepatitis C Virus (HCV) at 6, 12, 18, 24, and 48 hours post-infection. HCV is a leading cause of chronic liver disease. Results provide insight into molecular mechanisms that contribute to HCV-associated liver pathogenesis	time	24 hours	12 hours	http://www.ncbi.nlm.nih.gov/sites/GDSbrowser?acc=GDS4160		Pathogenesis;Infection, NOS;Liver diseases;Communicable Diseases;Hepatitis C virus;Disease of liver
GDS1973	73.3761133357055	0.000999000999000999	Various prostate cell types	Analysis of basal, luminal secretory, stromal fibromuscular, and endothelial cells of the prostate. Cell types separated with magnetic cell sorting (MACS) based on cell-type specific cluster designation (CD) antigens. Results identify gene expression signatures at the level of individual cell types	cell.type	stromal fibromuscular	luminal secretory	http://www.ncbi.nlm.nih.gov/sites/GDSbrowser?acc=GDS1973	Specific antigens;Specific antigen
GDS4387	73.2003243762185	0.000999000999000999	Hepatitis B virus (HBV)-associated acute liver failure (ALF) patients: liver explant	Analysis of explanted livers of 4 patients with HBV-associated ALF who underwent liver transplantation. Liver has inherent regenerative capacity via hepatic stem/progenitor cells (HSPC) when hepatic loss is massive. Results provide insight into role of HSPC in liver regeneration associated with ALF	disease.state	HBV-associated ALF	normal	http://www.ncbi.nlm.nih.gov/sites/GDSbrowser?acc=GDS4387		Liver regeneration;Liver regeneration disorder
GDS2548	73.1179529992745	0.000999000999000999	Preeclampsia: uteroplacental tissues	Analysis of the deciduas, placentas, and fat tissues of preeclamptic women. The decidua and the placenta are two tissues of the uteroplacental unit. Results provide insight into the role of the uteroplacental renin-angiotensin system in the pathogenesis of preeclampsia	tissue	placenta	fat	http://www.ncbi.nlm.nih.gov/sites/GDSbrowser?acc=GDS2548		Pre-eclamptic NOS;Pre-Eclampsia;Pathogenesis
GDS4114	72.3654722846328	0.000999000999000999	Reactive stroma of breast and prostate cancer	Analysis of stroma associated with prostate and breast invasive tumors. Stromal reaction (tumor-associated tissue remodeling) occurs in various cancers. Results provide insight into whether this stromal response is largely a generic phenomenon or whether it reflects tumor-specific properties	disease.state	invasive tumor associated	normal	http://www.ncbi.nlm.nih.gov/sites/GDSbrowser?acc=GDS4114		Neoplasm;Malignant Neoplasms;Breast Tumors;Tumor;Primary malignant neoplasm;Cancer;Mammary Neoplasms
GDS4179	70.1510318695091	0.000999000999000999	Hodgkin and non-Hodgkin lymphoma cell lines	Analysis of lymphoid cell lines of Hodgkin, non-Hodgkin, and acute leukemia origin. Aberrant NOTCH activity is involved in the pathogenesis of B cell-derived lymphomas. Results provide insight into the molecular basis of deregulated NOTCH activity	cell.line	SU-DHL-4	L540Cy	http://www.ncbi.nlm.nih.gov/sites/GDSbrowser?acc=GDS4179		B-Cell Lymphomas;Pathogenesis;Acute Leukemia Not Otherwise Specified;Acute Undifferentiated Leukemia;Acute leukemia;Non hodgkin;Acute leukaemia;Lymphoma, Non-Hodgkin
GDS2737	69.9371267026632	0.000999000999000999	Endometriosis	Analysis of endometrial specimens from women with endometriosis. Endometrial gene expression examined at various phases of the menstrual cycle. Results provide insight into the molecular pathogenesis of endometriosis	other	proliferative	early secretory	http://www.ncbi.nlm.nih.gov/sites/GDSbrowser?acc=GDS2737		Endometriosis;Pathogenesis
GDS2635	69.3950944015823	0.000999000999000999	Invasive ductal and lobular breast carcinomas	Analysis of invasive ductal carcinoma (IDC) cells, invasive lobular carcinoma (ILC) cells, and their normal counterparts. Cells obtained from postmenopausal breast cancer patients. Results provide insight into the molecular differences between IDC and ILC	disease.state	invasive lobular carcinoma	lobular control	http://www.ncbi.nlm.nih.gov/sites/GDSbrowser?acc=GDS2635		Malignant neoplasm of breast;Invasive Lobular Carcinoma;Invasive duct cell carcinoma;Invasive Ductal Carcinoma, Not Otherwise Specified;Breast Cancer;Invasive Ductal Breast Carcinoma;Breast Carcinoma;Invasive Lobular Breast Carcinoma
GDS4296	68.9274806856477	0.000999000999000999	NCI-60 cancer cell line panel	Analysis of cell lines from 9 different cancer tissue of origin types (Breast, Central Nervous System, Colon, Leukemia, Melanoma, Non-Small Cell Lung, Ovarian, Prostate, and Renal) from the NCI-60 panel. Results provide insight into molecular mechanisms underlying the various cancer types	tissue	non-small cell lung	colon	http://www.ncbi.nlm.nih.gov/sites/GDSbrowser?acc=GDS4296		Leukemia;Malignant Neoplasms;melanoma;Leukaemia;Primary malignant neoplasm;Cancer
GDS4141	68.5940980470802	0.000999000999000999	Alzheimer's disease: induced pluripotent stem cells with Presenilin 2 mutation (N141)	Analysis of 2 iPSC clones with presenilin 2 (PS2) mutation N141, established by retroviral transduction of fibroblasts from a Familial Alzheimer\u2019s disease (FAD) patient. PS2 mutations are causative factors for autosomal-dominant early-onset FAD. Results provide insight into molecular basis of FAD	cell.line	presenilin 2 (PS2) iPSCs	control IPSCs	http://www.ncbi.nlm.nih.gov/sites/GDSbrowser?acc=GDS4141
GDS4147	67.9276525999366	0.000999000999000999	Relapsing-remitting multiple sclerosis therapy of Interferon-\u03b2 Betaferon or Rebif: peripheral mononuclear blood cells	Temporal analysis of PBMCs from relapsing-remitting multiple sclerosis (RRMS) patients treated with Interferon-\u03b2-1b (Betaferon) or IFN\u03b2-1a (Rebif). Half of the patients developed neutralizing antibodies (NAB) to IFN\u03b2. Results provide insight into molecular basis of IFN\u03b2 bioactivity in MS patient	time	12 month	baseline	http://www.ncbi.nlm.nih.gov/sites/GDSbrowser?acc=GDS4147
GDS4279	67.8902366714299	0.000999000999000999	Early and advanced idiopathic pulmonary fibrosis: whole lung	Analysis of whole lung biopsy or explant from early and advanced idiopathic pulmonary fibrosis (IPF) patients. IPF is a fatal subtype of pulmonary fibrosis difficult to diagnose. Results provide insight into developing a diagnostic model for IPF	gender	male	female	http://www.ncbi.nlm.nih.gov/sites/GDSbrowser?acc=GDS4279		Idiopathic Pulmonary Fibrosis;Pulmonary Fibrosis
GDS2902	67.2755861122944	0.000999000999000999	Hypoxia and lymphathic endothelial cells	Analysis of lymphatic endothelial cells (LECs) subjected to hypoxia or treated with conditioned media from lung carcinoma cells grown under hypoxic conditions. LECs contribute to tumor metastasis	protocol	normoxia	hypoxia	http://www.ncbi.nlm.nih.gov/sites/GDSbrowser?acc=GDS2902		Neoplasm;Lung Carcinoma;Condition;Tumor;Carcinoma of lung;Disease;Hypoxia;Hypoxic
GDS3364	66.7431068925931	0.000999000999000999	Cell cycle of T98G glioblastoma cell line	Analysis of T98G cells in asynchronously growing state, after 72 hr of serum starvation to induce G0, or after serum restimulation to enter cell cycle. Results provide insight into mammalian cell-cycle gene regulation and mechanisms underlying repression of cell cycle dependent genes in quiescence	growth.protocol	G1 phase	G0 phase	http://www.ncbi.nlm.nih.gov/sites/GDSbrowser?acc=GDS3364
GDS3954	66.6119399045445	0.000999000999000999	Polychlorobiphenyl non-coplanar congener PCB-153 effect on liver cell line	Analysis of a metabolically competent HepG2 cells exposed to PCB-153, a prototype non-coplanar congener of polychlorobiphenyls (PCB). Different congeners of PCB lead to varying degrees of cellular oxidative stress. Results provide insight into the mechanism of action of non-coplanar PCB congeners	time	18 hrs	0 hrs	http://www.ncbi.nlm.nih.gov/sites/GDSbrowser?acc=GDS3954	Plumbum metallicum, homeopathic preparation;Polychlorinated Biphenyls;Dietary Lead;Lead;Polychlorobiphenyl
GDS3615	66.5039628643397	0.000999000999000999	Asthma exacerbation and convalescent phases: peripheral blood mononuclear cells	Analysis of peripheral blood mononuclear cells of children with acute asthma during exacerbation and at subsequent convalescence. Severe asthma exacerbations in children are associated with viral infection and occur among atopics. Results provide insight into the significance of these comorbidities	disease.state	exacerbation	convalescence	http://www.ncbi.nlm.nih.gov/sites/GDSbrowser?acc=GDS3615		Atopy;Atopic;Viral infection;Virus Diseases
GDS3516	66.1551322889286	0.000999000999000999	Nodular lymphocyte-predominant Hodgkin lymphoma: lymphocytic and histiocytic cells	Analysis of neoplastic lymphocytic and histiocytic cells (L&H) dissected from nodular lymphocyte-predominant Hodgkin lymphoma tumors (NLPHL). L&H cells represent less than 1 percent of cells in NLPHL tumors. Results provide insight into the pathogenesis of NLPHL	disease.state	normal plasma cells	normal naive B-cells	http://www.ncbi.nlm.nih.gov/sites/GDSbrowser?acc=GDS3516		Tumors;Pathogenesis;Neoplasm;Nodular Lymphocyte Predominant Hodgkin Lymphoma
GDS4365	66.0518656456239	0.000999000999000999	Intestinal mucosa response to active and inactive ulcerative colitis: colon biopsies	Analysis of colonic biopsies from patients with histologically active or inactive UC and from healthy, non-inflammatory controls. UC is a chronic inflammatory disease with periods of active disease followed by remission. Results provide insight into molecular events associated with UC remission	agent	systemic steroids	no treatment	http://www.ncbi.nlm.nih.gov/sites/GDSbrowser?acc=GDS4365		Cancer Remission;Chronic inflammatory disorder;Chronic inflammatory disease;Remission
GDS3903	66.042066158712	0.000999000999000999	Unruptured intracranial arterial aneurysm: cerebral artery	Analysis of unruptured intracranial arterial aneurysm (IAA). IAA is a cerebrovascular disorder in which weakness in a cerebral artery wall causes localized dilation and possible rupture. Results provide insight into the molecular mechanisms underlying cerebral aneurysms	disease.state	intracranial arterial aneurysm	normal healthy control	http://www.ncbi.nlm.nih.gov/sites/GDSbrowser?acc=GDS3903		Cerebral Aneurysm;Cerebral Aneurysms;Pathological Dilatation;CEREBROVASCULAR DISORDER;Dilation;Intracranial arterial aneurysm;Cerebrovascular Disorders;Cerebral arterial aneurysm
GDS4291	65.8848640294651	0.000999000999000999	Inhibition of Notch signaling in T cell acute lymphoblastic leukemia cell lines	Analysis of T-ALL cell lines treated with \u03b3-secretase inhibitor (GSI) to block Notch signaling. Cell lines include parental cells and cells transduced with ICN (a GSI-independent form of activated Notch1) or with c-Myc (a downstream Notch1 target). Results provide insight into Notch1 role in T-ALL	cell.line	HPBALL	ALLSIL	http://www.ncbi.nlm.nih.gov/sites/GDSbrowser?acc=GDS4291
GDS3977	65.7536576758369	0.000999000999000999	Adenoid cystic carcinoma xenograft models	Analysis of xenograft tumors derived from clinical samples of adenoid cystic carcinomas (ACC) implanted into immunodeficient nu/nu mice within 36\u2009hrs of tissue being removed from the human subjects. Results provide insight into molecular mechanisms underlying the pathology of AC	tissue	xenograft ACC	primary ACC	http://www.ncbi.nlm.nih.gov/sites/GDSbrowser?acc=GDS3977
GDS4124	64.9674031185154	0.000999000999000999	Genetic reprogramming of prostate cancer-associated stromal cells	Analysis of induced pluripotent stem cells (iPSCs) obtained from sorted CD90+ prostate cancer (CP)-associated stromal cells cultured and transfected with stem cell transcription factor POU5F1/LIN28/NANOG/SOX2 expression vectors. Results provide insight into the stemness of CP stromal-derived iPSCs	cell.type	iPS cells from PC-A stromal cells	embryonal carcinoma NCCIT cells	http://www.ncbi.nlm.nih.gov/sites/GDSbrowser?acc=GDS4124	SOX2 Transcription Factor;POU5F1 Transcription Factor;CD90;Octamer Transcription Factor-3;POU5F1;Thy-1 Membrane Glycoprotein;SOX2	Prostate Cancer;Prostate carcinoma;Malignant neoplasm of prostate
GDS4067	64.9640261886528	0.000999000999000999	Metastatic hybrid cell line of estrogen receptor-negative and -positive breast cancer cells in mouse bone marrow	Analysis of estrogen-independent, metastatic hybrid cell line B6TC generated by aggressive, ER-negative (MDA231) and less aggressive, ER-positive (ZR75) breast cancer cells in mouse bone marrow. Results provide insight into the contribution of breast tumor heterogeneity to its progression	cell.line	MDA231	B6TC hybrid	http://www.ncbi.nlm.nih.gov/sites/GDSbrowser?acc=GDS4067	Estrogens;Estrogen;Estrogen [EPC]	Progression;Disease Progression;Tumor of the Breast;Mammary Neoplasms
GDS4298	64.9381361259071	0.000999000999000999	Leukemia-specific fusion gene ETV6/RUNX1 knockdown effect on ETV6/RUNX1-positive, B-cell precursor acute lymphoblastic leukemia cell lines",	Analysis of ETV6/RUNX1 (E/R) fusion gene-positive, BCP ALL cell lines (AT2 and REH) following E/R knockdown. E/R (also known as TEL/AML1) is the most frequent gene fusion in childhood ALL. Results provide insight into role of E/R gene fusion in leukemia propagation and maintenance	protocol	E/R targeting shRNA treatment	control non targeting treatment	http://www.ncbi.nlm.nih.gov/sites/GDSbrowser?acc=GDS4298	TEL-AML1;TEL-AML1 fusion protein	Leukemia;Leukaemia
GDS3912	62.9053404717584	0.000999000999000999	Adrenocortical adenomas harboring \u03b2-catenin gene CTNNB1 mutations	Analysis of adrenocortical adenomas (AA) with \u03b2-catenin missense mutations and AAs with wild-type CTNNB1. Mutations of CTNNB1 are common in AA and adrenocortical carcinomas (ACC). Results provide insight into molecular mechanisms deregulated in adrenocortical tumors with CTNNB1 genetic alterations	genotype/variation	CTNNB1 mutant S37C	wild type CTNNB1	http://www.ncbi.nlm.nih.gov/sites/GDSbrowser?acc=GDS3912
GDS1269	62.8992715719052	0.000999000999000999	Cigarette smoking effect on alveolar macrophage	Analysis of alveolar macrophages from 15 cigarette smokers, 15 non-smokers and 15 asthmatics. Results suggest that alveolar macrophage activation induced by smoking contributes to emphysema	agent	smoker	non-smoker control	http://www.ncbi.nlm.nih.gov/sites/GDSbrowser?acc=GDS1269		Emphysema;Asthmatics;Asthma;Pulmonary Emphysema;EMPHYSEMA;Pathological accumulation of air in tissues
GDS3912	62.7426304259444	0.000999000999000999	Adrenocortical adenomas harboring \u03b2-catenin gene CTNNB1 mutations	Analysis of adrenocortical adenomas (AA) with \u03b2-catenin missense mutations and AAs with wild-type CTNNB1. Mutations of CTNNB1 are common in AA and adrenocortical carcinomas (ACC). Results provide insight into molecular mechanisms deregulated in adrenocortical tumors with CTNNB1 genetic alterations	other	tumor secretion profile	NA	http://www.ncbi.nlm.nih.gov/sites/GDSbrowser?acc=GDS3912
GDS3354	62.4320042135192	0.000999000999000999	Low-dose cadmium effect on prostate epithelial cells: time course	Analysis of immortalized normal prostate epithelial cell line NPrEC exposed to non-cytotoxic levels of cadmium (2.5uM CdCl2) for up to 32hrs. Cadmium is implicated in prostate carcinogenesis. Results provide insight into mechanisms underlying the initiation of carcinogenesis by Cd in the prostate	time	4 h	0 h	http://www.ncbi.nlm.nih.gov/sites/GDSbrowser?acc=GDS3354	Cadmium chloride;CdCl2;Cadmium;Dietary Cadmium	Carcinogenesis
GDS3761	62.3637548251258	0.000999000999000999	1,25 dihydroxyvitamin D effect on prostate epithelial cell line RWPE1: time course	Analysis of RWPE1 cells, an immortalized, non-tumorigenic prostate epithelial cell line, treated with 1,25(OH)2D (i.e., the active form of vitamin D), for up to 48 hrs. RWPE1 cells are growth arrested by 1,25(OH)2D. Results provide insight into the role of vitamin D in prostate cancer prevention	time	24 hrs	6 hrs	http://www.ncbi.nlm.nih.gov/sites/GDSbrowser?acc=GDS3761	Hydroxide Ion;D Vitamin;OH-;Ergocalciferol;Vitamin D;Vitamin D [EPC]	Arrested;Cardiac Arrest;Tumorigenicity
GDS4296	62.2812754889754	0.000999000999000999	NCI-60 cancer cell line panel	Analysis of cell lines from 9 different cancer tissue of origin types (Breast, Central Nervous System, Colon, Leukemia, Melanoma, Non-Small Cell Lung, Ovarian, Prostate, and Renal) from the NCI-60 panel. Results provide insight into molecular mechanisms underlying the various cancer types	tissue	ovarian	breast	http://www.ncbi.nlm.nih.gov/sites/GDSbrowser?acc=GDS4296		Leukemia;Malignant Neoplasms;melanoma;Leukaemia;Primary malignant neoplasm;Cancer
GDS4179	62.2498136986563	0.000999000999000999	Hodgkin and non-Hodgkin lymphoma cell lines	Analysis of lymphoid cell lines of Hodgkin, non-Hodgkin, and acute leukemia origin. Aberrant NOTCH activity is involved in the pathogenesis of B cell-derived lymphomas. Results provide insight into the molecular basis of deregulated NOTCH activity	cell.line	Namalwa	HDLM2	http://www.ncbi.nlm.nih.gov/sites/GDSbrowser?acc=GDS4179		B-Cell Lymphomas;Pathogenesis;Acute Leukemia Not Otherwise Specified;Acute Undifferentiated Leukemia;Acute leukemia;Non hodgkin;Acute leukaemia;Lymphoma, Non-Hodgkin
GDS4365	61.937065077367	0.000999000999000999	Intestinal mucosa response to active and inactive ulcerative colitis: colon biopsies	Analysis of colonic biopsies from patients with histologically active or inactive UC and from healthy, non-inflammatory controls. UC is a chronic inflammatory disease with periods of active disease followed by remission. Results provide insight into molecular events associated with UC remission	agent	no treatment	5-ASA	http://www.ncbi.nlm.nih.gov/sites/GDSbrowser?acc=GDS4365		Cancer Remission;Chronic inflammatory disorder;Chronic inflammatory disease;Remission
GDS2546	48.0834488520952	0.000999000999000999	Metastatic prostate cancer (HG-U95B)	Analysis of metastatic prostate tumors and primary prostate tumors. Normal tissue adjacent to the tumor and normal donor tissue also examined. Metastasis reflects the most adverse clinical outcome. Results provide insight into the molecular mechanisms underlying the metastatic process	tissue	metastatic prostate tumor	normal prostate tissue	http://www.ncbi.nlm.nih.gov/sites/GDSbrowser?acc=GDS2546		Secondary Neoplasm;Neoplasm Metastasis;Primary tumors;Neoplasm;Prostatic Neoplasms;Tumor;Prostate tumors;Tumor of prostate;Primary Neoplasm;Metastasis;Metastatic Neoplasm
GDS1495	43.7271569330074	0.000999000999000999	Obesity: adipocyte expression profile (HG-U95B)	Analysis of cultured abdominal subcutaneous mature adipocytes from 9 male and 10 female non-diabetic obese Pima Indians. The prevalence of obesity in Pima Indians is among the highest of any population. Results provide insight into the role of adipocytes in obesity and obesity-related inflammation	disease.state	obese	lean	http://www.ncbi.nlm.nih.gov/sites/GDSbrowser?acc=GDS1495		Obesity;Inflammation;Obese
GDS2517	42.4897791673903	0.001	Hyperhomocysteinemia model: heart	Analysis of hearts of animals given drinking water containing 10 g/L of L-methionine to induce chronic hyperhomocysteinemia (HHcy). HHcy is characterized by an elevation in plasma homocysteine, and is a risk factor for atherosclerosis. Results provide insight into the impact of HHcy on the heart	disease.state	hyperhomocysteinemia	control	http://www.ncbi.nlm.nih.gov/sites/GDSbrowser?acc=GDS2517	homocysteine;Homocystine;A-factor (Streptomyces);A-factor;factor A;Methionine	Homocysteinemia;HYPERHOMOCYSTEINEMIA;Hyperhomocysteinemia;Atherosclerosis
GDS2546	40.9148830272648	0.000999000999000999	Metastatic prostate cancer (HG-U95B)	Analysis of metastatic prostate tumors and primary prostate tumors. Normal tissue adjacent to the tumor and normal donor tissue also examined. Metastasis reflects the most adverse clinical outcome. Results provide insight into the molecular mechanisms underlying the metastatic process	tissue	primary prostate tumor	normal prostate tissue	http://www.ncbi.nlm.nih.gov/sites/GDSbrowser?acc=GDS2546		Secondary Neoplasm;Neoplasm Metastasis;Primary tumors;Neoplasm;Prostatic Neoplasms;Tumor;Prostate tumors;Tumor of prostate;Primary Neoplasm;Metastasis;Metastatic Neoplasm
GDS270	37.4794113081062	0.003	Duchenne muscular dystrophy (HG-U95B)	Examination of muscle biopsies from Duchenne muscular dystrophy patients and normal subjects of various age groups. Both mixed groups of patients (5 patient biopsies per group) and individual biopsies analyzed	age	5 to 6 years	4 to 13 years	http://www.ncbi.nlm.nih.gov/sites/GDSbrowser?acc=GDS270		Muscular Dystrophy, Duchenne
GDS270	37.4794113081062	0.003	Duchenne muscular dystrophy (HG-U95B)	Examination of muscle biopsies from Duchenne muscular dystrophy patients and normal subjects of various age groups. Both mixed groups of patients (5 patient biopsies per group) and individual biopsies analyzed	disease.state	Duchenne muscular dystrophy	normal	http://www.ncbi.nlm.nih.gov/sites/GDSbrowser?acc=GDS270		Muscular Dystrophy, Duchenne
