# Supplementary material for: Gene signature associated with benign neurofibroma transformation to malignant peripheral nerve sheath tumors
Source: PLOS journal article supplement (doi:10.1371/journal.pone.0178316), 2017-05-24
Supplement: S12 (10.1371/journal.pone.0178316.s012) [file journal.pone.0178316.s012]

**S12 Table: Down-regulated genes from the MPNST vs. NF signature previously related with NF and/or MPNST.**

| Rank | ENSGENE         | hgnc_symbol | chrom_name | band   | Relationship with NF or MPNST                                                                                                                                                                                              | Reference  |
|------|-----------------|-------------|------------|--------|----------------------------------------------------------------------------------------------------------------------------------------------------------------------------------------------------------------------------|------------|
| 235  | ENSG00000188580 | NKAIN2      | 6          | q22.31 | Deletion of its chromosomal region in NF1-associated cutaneous neurofibromas.                                                                                                                                              | [1]        |
| 218  | ENSG00000196154 | S100A4      | 1          | q21.3  | Immunostaining reaction variable in malignant melanoma, and benign and malignant peripheral nerve sheath tumors.                                                                                                           | [2]        |
| 208  | ENSG00000197956 | S100A6      | 1          | q21.3  | Its expression differentiates desmoplastic melanomas from MPNSTs but its diagnostic use is limited by overlapping. Differential expression in malignant melanoma, and benign and malignant peripheral nerve sheath tumors. | [3]<br>[2] |
| 163  | ENSG00000197971 | MBP         | 18         | q23    | Overexpressed in NF1-associated compared to sporadic MPNST. One of the proteins complexed in RNA granules with NF1:LRPPRC.                                                                                                 | [4]<br>[5] |
| 147  | ENSG00000152061 | RABGAP1L    | 1          | q25.1  | Deletion of its chromosomal region in NF1-associated cutaneous neurofibromas.                                                                                                                                              | [1]        |
| 139  | ENSG00000105855 | ITGB8       | 7          | p21.1  | MPNST-specific copy number variations.                                                                                                                                                                                     | [6]        |
| 129  | ENSG00000168329 | CX3CR1      | 3          | p22.2  | Chemokine receptor expressed from high to moderate levels in benign and malignant nerve sheath tumors.                                                                                                                     | [7]        |
| 128  | ENSG00000107562 | CXCL12      | 10         | q11.21 | High to moderate levels of expression in benign and malignant nerve sheath tumors. Chemokine promoting cell proliferation in MPNSTs.                                                                                       | [7]<br>[8] |
| 123  | ENSG00000277632 | CCL3        | 17         | q12    | Probably involved in recruitment of inflammatory cells by tumorigenic cells that could play a role in the auto-degeneration of Schwann cell tumors.                                                                        | [9]        |
| 72   | ENSG00000109099 | PMP22       | 17         | p12    | Down-regulated in MPNST cell lines compared to normal Schwann cells.                                                                                                                                                       | [10]       |
| 63   | ENSG00000261857 | MIA         | 19         | q13.2  | Potential serum biomarker for tumor load in NF1.                                                                                                                                                                           | [11]       |
| 59   | ENSG00000158887 | MPZ         | 1          | q23.3  | Down-regulated Schwann cell-specific gene in the comparison MPNST vs. pNF.                                                                                                                                                 | [12]       |
| 56   | ENSG00000169554 | ZEB2        | 2          | q22.3  | Transcription factor associated to the epithelial-mesenchymal transition in neurofibromatosis type 1, up-regulated in NF1-associated neurofibromas and Schwann cells.                                                      | [13]       |
| 42   | ENSG00000189058 | APOD        | 3          | q29    | Its expression increases with the formation of NFs and is down-regulated during malignant transformation of NFs.                                                                                                           | [14]       |
| 41   | ENSG00000189058 | TIMP4       | 3          | p25.2  | Down-regulated in MPNST vs. pNF                                                                                                                                                                                            | [12]       |

|    |                 |        |    |        |                                                                                                                                                                                                                                                       |                              |
|----|-----------------|--------|----|--------|-------------------------------------------------------------------------------------------------------------------------------------------------------------------------------------------------------------------------------------------------------|------------------------------|
|    |                 |        |    |        | comparison.                                                                                                                                                                                                                                           |                              |
| 33 | ENSG00000198910 | L1CAM  | X  | q28    | Down-regulated in MPNST vs. pNF comparison.<br>Overexpressed in NF1-associated vs. sporadic MPNSTs.<br>Highly expressed in benign NF1 tumors and down-regulated in MPNST vs. benign NF1-associated tumors.                                            | [12]<br>[4]<br>[15]          |
| 28 | ENSG00000065361 | ERBB3  | 12 | q13.2  | Its expression is rare in NF1-related tumors, particularly in MPNST.<br>Down-regulated in MPNST vs. pNF comparison.<br>Variable expression in NFs and MPNSTs.<br>It is present in MPNST invadopodia.                                                  | [16]<br>[12]<br>[17]<br>[18] |
| 23 | ENSG00000132470 | ITGB4  | 17 | q25.1  | Down-regulated in MPNST vs. pNF comparison.<br>Its genomic region was amplified; copy number changes of this gene were observed in 32% of MPNSTs.<br>Included in a significant gain aberration.                                                       | [12]<br>[19]<br>[20]         |
| 21 | ENSG00000101265 | RASSF2 | 20 | p13    | Down-regulated in MPNST vs. pNF comparison.<br>Included in a significant deletion aberration.                                                                                                                                                         | [12]<br>[20]                 |
| 18 | ENSG00000100146 | SOX10  | 22 | q13.1  | Down-regulated in MPNST vs. pNF comparison.<br>Down-regulated in comparison MPNST vs. Schwann cells.<br>More specific than S100 in diagnosis of neural crest-derived tumors.<br>Its complete silencing discriminates MPNSTs and cellular schwannomas. | [12]<br>[10]<br>[21]<br>[22] |
| 9  | ENSG00000168477 | TNXB   | 6  | p21.32 | Down-regulated in MPNST vs. pNF comparison.                                                                                                                                                                                                           | [12]                         |
| 5  | ENSG00000071991 | CDH19  | 18 | q22.1  | Significantly up-regulated in NF1 tumors.<br>Potential role in dermal neurofibroma initiation.                                                                                                                                                        | [23]                         |
| 2  | ENSG00000160307 | S100B  | 21 | q22.3  | Down-regulated in MPNST vs. pNF comparison.<br>Diffuse staining in malignant melanoma and benign peripheral nerve sheath tumors; it reacts in 30% of MPNSTs.                                                                                          | [12]<br>[2]                  |

- 
- Asai A, Karnan S, Ota A, Takahashi M, Damdindorj L, Konishi Y, et al. High-resolution 400K oligonucleotide array comparative genomic hybridization analysis of neurofibromatosis type 1-associated cutaneous neurofibromas. *Gene*. 2015;558:220–6.
  - Nonaka D, Chiriboga L, Rubin BP. Differential expression of S100 protein subtypes in malignant melanoma, and benign and malignant peripheral nerve sheath tumors. *J Cutan Pathol*. 2008;35:1014–9.
  - Fullen DR, Garrisi AJ, Sanders D, Thomas D. Expression of S100A6 protein in a broad spectrum of cutaneous tumors using tissue microarrays. *J Cutan Pathol*. 2008;35:28–34.
  - Watson MA, Perry A, Tihan T, Prayson RA, Guha A, Bridge J, et al. Gene expression profiling reveals unique molecular subtypes of Neurofibromatosis Type I-associated and sporadic malignant peripheral nerve sheath tumors. *Brain Pathol*. 2004;14:297–303.
  - Arun V, Wiley JC, Kaur H, Kaplan DR, Guha A. A novel neurofibromin (NF1) interaction with the leucine-rich pentatricopeptide repeat motif-containing protein links neurofibromatosis type 1 and the french canadian variant of leigh's syndrome in a common molecular complex. *J Neurosci Res*. 2013;91:494–505.

6. Upadhyaya M, Spurlock G, Thomas L, Thomas NST, Richards M, Mautner VF, et al. Microarray-based copy number analysis of neurofibromatosis type-1 (NF1)-associated malignant peripheral nerve sheath tumors reveals a role for Rho-GTPase pathway genes in NF1 tumorigenesis. *Hum Mutat.* 2012;33:763–76.
7. Hattermann K, Li G, Hugo H-H, Mentlein R, Mehdorn HM, Held-Feindt J. Expression of the chemokines CXCL12 and CX3CL1 and their receptors in human nerve sheath tumors. *Histol Histopathol.* 2013;28:1337–49.
8. Mo W, Chen J, Patel A, Zhang L, Chau V, Li Y, et al. CXCR4/CXCL12 Mediate Autocrine Cell- Cycle Progression in NF1-Associated Malignant Peripheral Nerve Sheath Tumors. *Cell.* 2013;152:1077–90.
9. Mori K, Chano T, Yamamoto K, Matsusue Y, Okabe H. Expression of macrophage inflammatory protein-1alpha in Schwann cell tumors. *Neuropathology.* 2004;24:131–5.
10. Miller SJ, Rangwala F, Williams J, Ackerman P, Kong S, Jegga AG, et al. Large-scale molecular comparison of human Schwann cells to malignant peripheral nerve sheath tumor cell lines and tissues. *Cancer Res.* 2006;66:2584–91.
11. Kolanczyk M, Mautner V, Kossler N, Nguyen R, Kühnisch J, Zemojtel T, et al. MIA is a potential biomarker for tumour load in neurofibromatosis type 1. *BMC Med.* 2011;9:82.
12. Lévy P, Vidaud D, Leroy K, Laurendeau I, Wechsler J, Bolasco G, et al. Molecular profiling of malignant peripheral nerve sheath tumors associated with neurofibromatosis type 1, based on large-scale real-time RT-PCR. *Mol Cancer.* 2004;3:20.
13. Arima Y, Hayashi H, Kamata K, Goto TM, Sasaki M, Kuramochi A, et al. Decreased expression of neurofibromin contributes to epithelial-mesenchymal transition in neurofibromatosis type 1. *Exp Dermatol.* 2009;19:e136–41.
14. HUNTER S, WEISS S, OU C, JAYE D, YOUNG A, WILCOX J, et al. Apolipoprotein D is down-regulated during malignant transformation of neurofibromas. *Hum Pathol.* 2005;36:987–93.
15. Blessmann M, Gröbe A, Quaas A, Kaifi JT, Mistakidis G, Bernreuther C, et al. Adhesion molecule L1 is down-regulated in malignant peripheral nerve sheath tumors versus benign neurofibromatosis type 1-associated tumors. *Oral Surg Oral Med Oral Pathol Oral Radiol.* 2012;113:239–44.
16. Li H, Velasco-Miguel S, Vass WC, Parada LF, DeClue JE. Epidermal growth factor receptor signaling pathways are associated with tumorigenesis in the Nf1:p53 mouse tumor model. *Cancer Res.* 2002;62:4507–13.
17. Stonecypher MS, Byer SJ, Grizzle WE, Carroll SL. Activation of the neuregulin-1/ErbB signaling pathway promotes the proliferation of neoplastic Schwann cells in human malignant peripheral nerve sheath tumors. *Oncogene.* 2005;24:5589–605.
18. Eckert JM, Byer SJ, Clodfelder-Miller BJ, Carroll SL. Neuregulin-1 $\beta$  and neuregulin-1 $\alpha$  differentially affect the migration and invasion of malignant peripheral nerve sheath tumor cells. *Glia.* 2009;57:1501–20.
19. Mantripragada KK, Spurlock G, Kluwe L, Chuzhanova N, Ferner RE, Frayling IM, et al. High-Resolution DNA Copy Number Profiling of Malignant Peripheral Nerve Sheath Tumors Using Targeted Microarray-Based Comparative Genomic Hybridization. *Clin Cancer Res.* 2008;14:1015–24.
20. Yang J, Du X. Genomic and molecular aberrations in malignant peripheral nerve sheath tumor and their roles in personalized target therapy. *Surg Oncol.* 2013;22:e53–7.
21. Karamchandani JR, Nielsen TO, van de Rijn M, West RB. Sox10 and S100 in the Diagnosis of Soft-tissue Neoplasms. *Appl Immunohistochem Mol Morphol.* 2012;20:445–50.
22. Pekmezci M, Reuss DE, Hirbe AC, Dahiya S, Gutmann DH, von Deimling A, et al. Morphologic and immunohistochemical features of malignant peripheral nerve sheath tumors and cellular schwannomas. *Mod Pathol.* 2015;28:187–200.
23. Iribar H, Jaka A, Ormaechea N, Tuneu A, Izeta A, Gutiérrez-Rivera A. Does Schwann cell dedifferentiation originate dermal neurofibromas? *Exp Dermatol.* 2016;25:901–3.
